# Supplementary material for: Molecular dynamics of zigzag single walled carbon nanotube immersion in water
Source: Royal Society of Chemistry journal article supplement (doi:10.1039/c0cp02028a), 2011-01-01
Supplement: c0cp02028a.pdf [file c0cp02028a.pdf]

ESI

**Table ESI 1. Potential parameters applied in simulations**

| Molecule/structure | centre       | $\sigma$ [nm] | $\epsilon$ [kJ/mole] | $q/e$                     |
|--------------------|--------------|---------------|----------------------|---------------------------|
| H <sub>2</sub> O   |              |               |                      |                           |
|                    | H            |               |                      | -1.04                     |
|                    | O            | 0.3154        | 0.6480               | 0.00                      |
|                    | charge point |               |                      | +0.52                     |
| Carbon nanotube    | C            | 0.3400        | 0.2329               | 0.00; +0.25; +0.50; +0.75 |
|                    | O            | 0.2960        | 0.8801               | 0.00; -0.25; -0.50; -0.75 |

**Table 1.** Values of the (12,6) Lennard-Jones parameters and the point charges used in the current study of H<sub>2</sub>O (TIP4P) adsorption in carbon membranes composed of single-walled nanotubes. [M. W. Mahoney and W. L. Jorgensen, *J. Chem. Phys.* **112** (2000) 8910-8922; W. L. Jorgensen, J. Chandrasekhar, J. D. Madura, R. W. Impey, and M. L. Klein, *J. Chem. Phys.* **79** (1983) 926-935, W. L. Jorgensen and J. D. Madura, *Mol. Phys.* **56** (1985) 1381-1392, respectively; M. Jorge, C. Schumacher and N. A. Seaton **18** (2002) *Langmuir* 9296-9306]

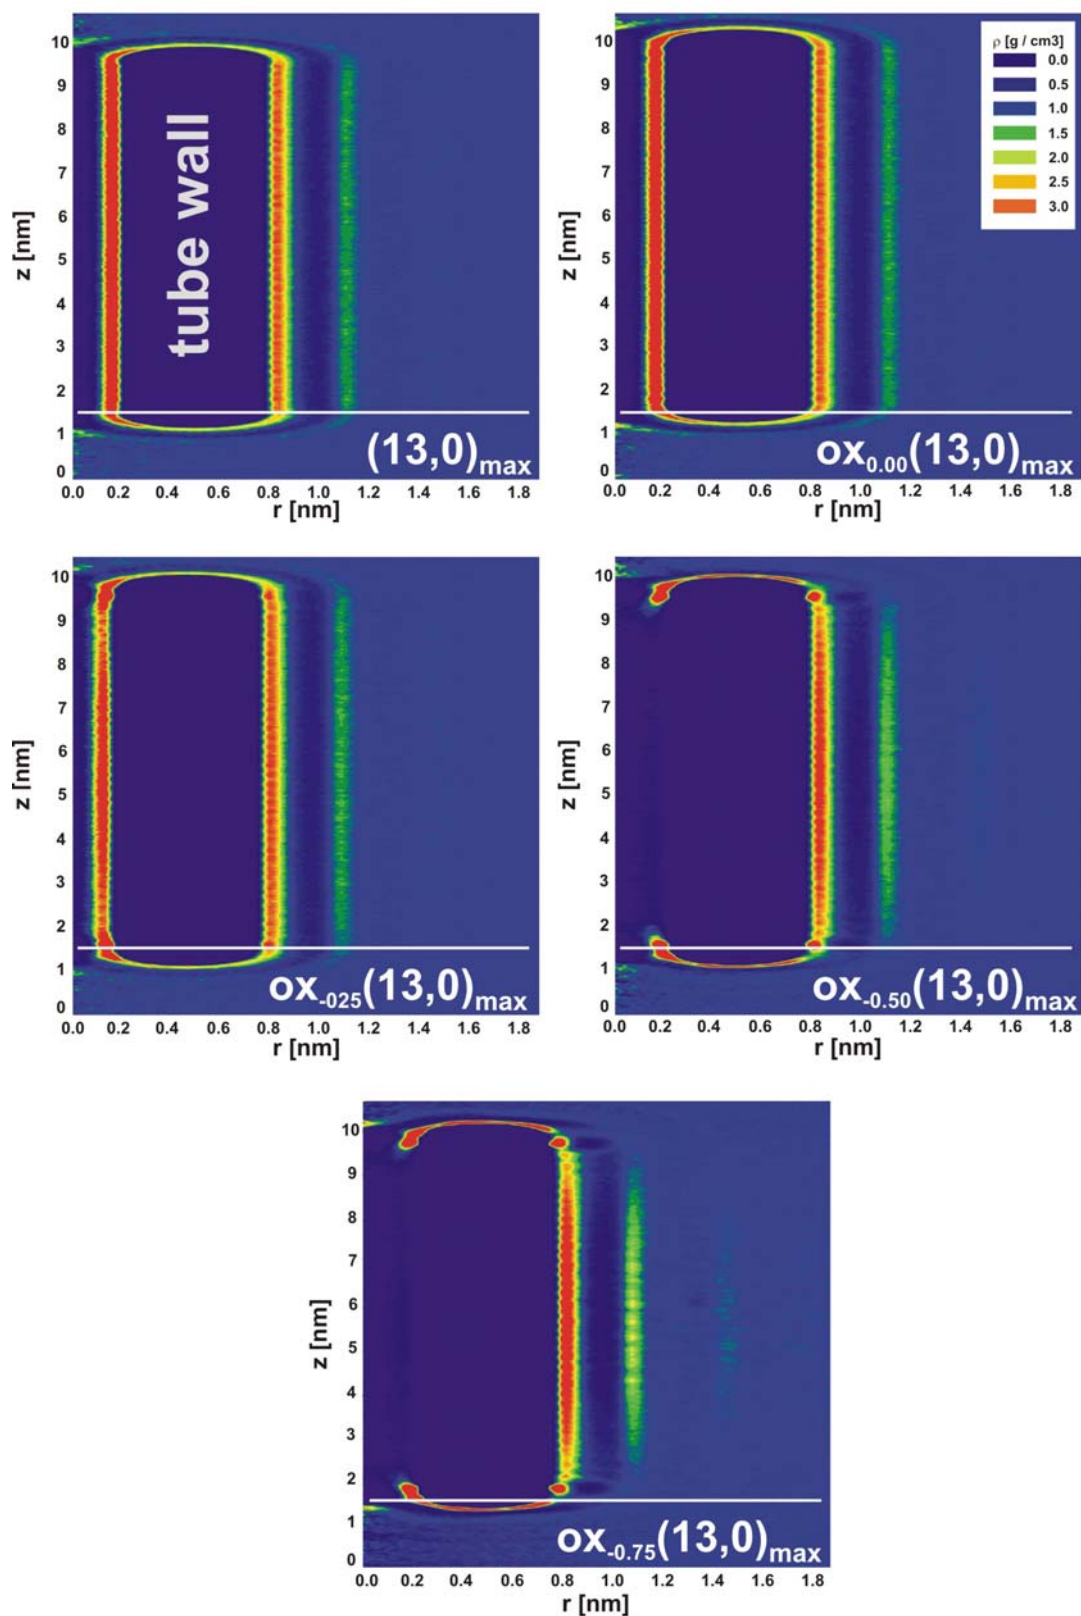

**Fig. ESI 1.** Density profiles (g/cm<sup>3</sup>) determined for selected tubes and assuming that the centre of the molecules is located on oxygen atom,  $r$  is the distance from the tube axis and  $z$  is the direction of the tube axis. The effect of charge distributions. White horizontal line shows the slice discussed in Fig. 5.

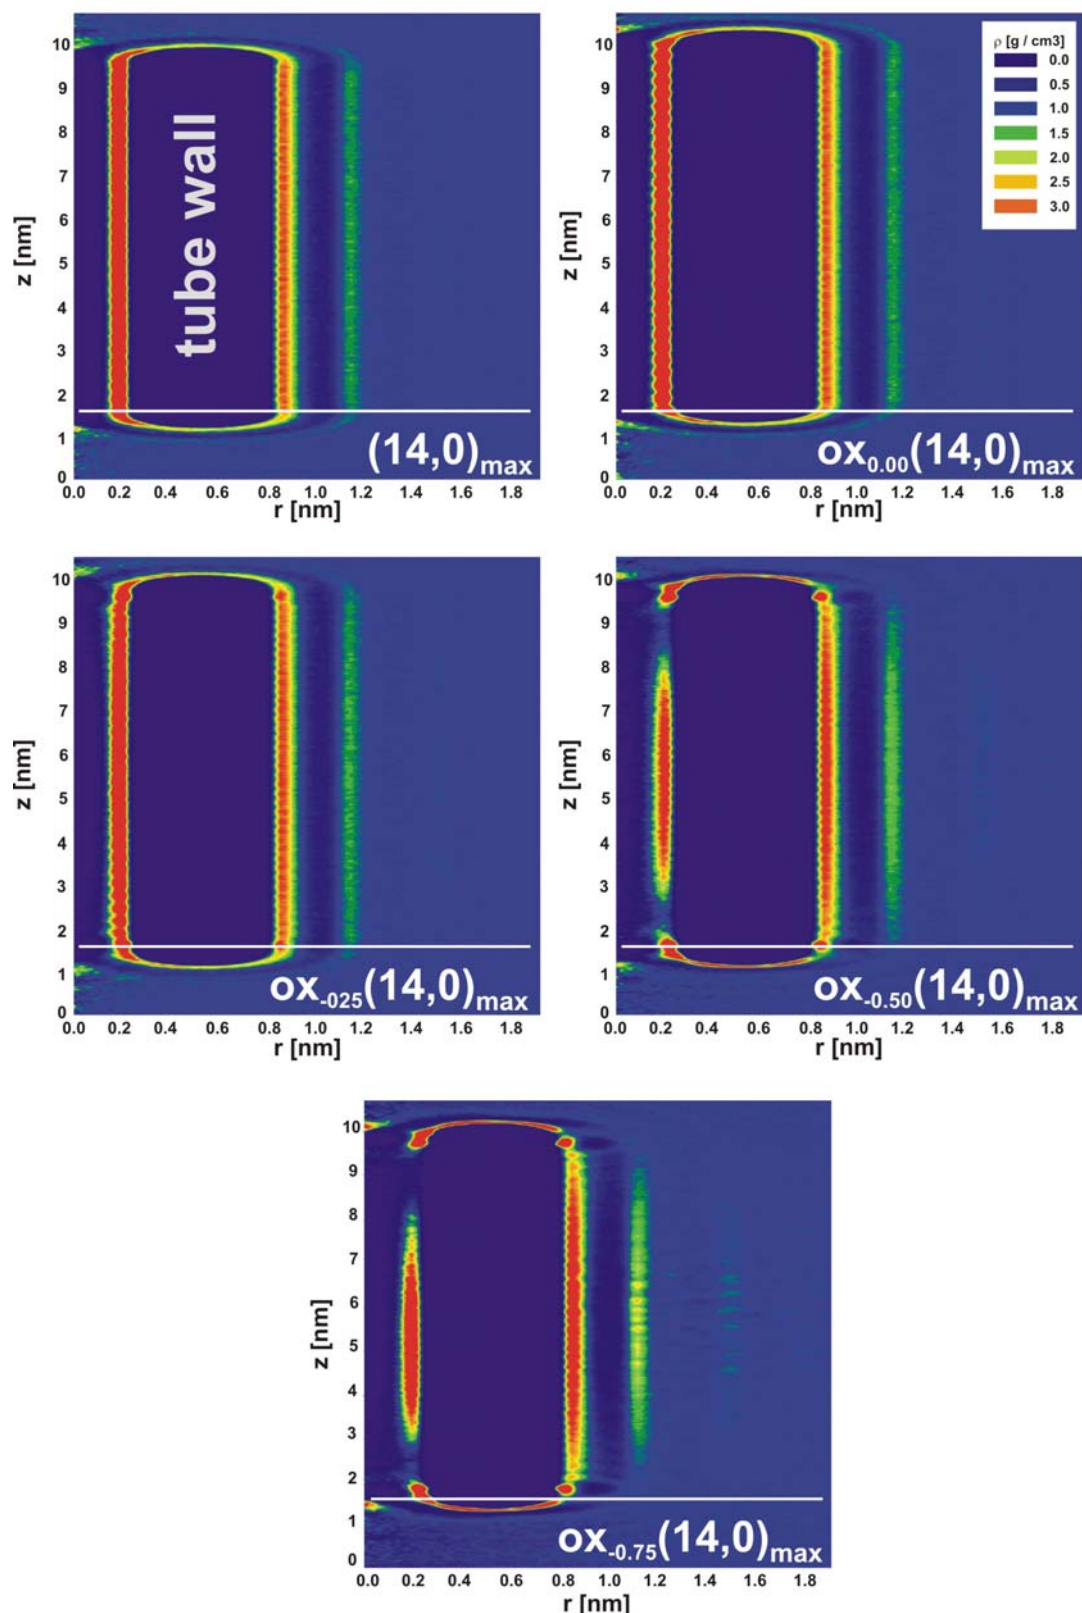

**Fig. ESI 2.** Density profiles ( $\text{g}/\text{cm}^3$ ) determined for selected tubes and assuming that the centre of the molecules is located on oxygen atom,  $r$  is the distance from the tube axis and  $z$  is the direction of the tube axis. The effect of charge distributions. White horizontal line shows the slice discussed in Fig. 5.

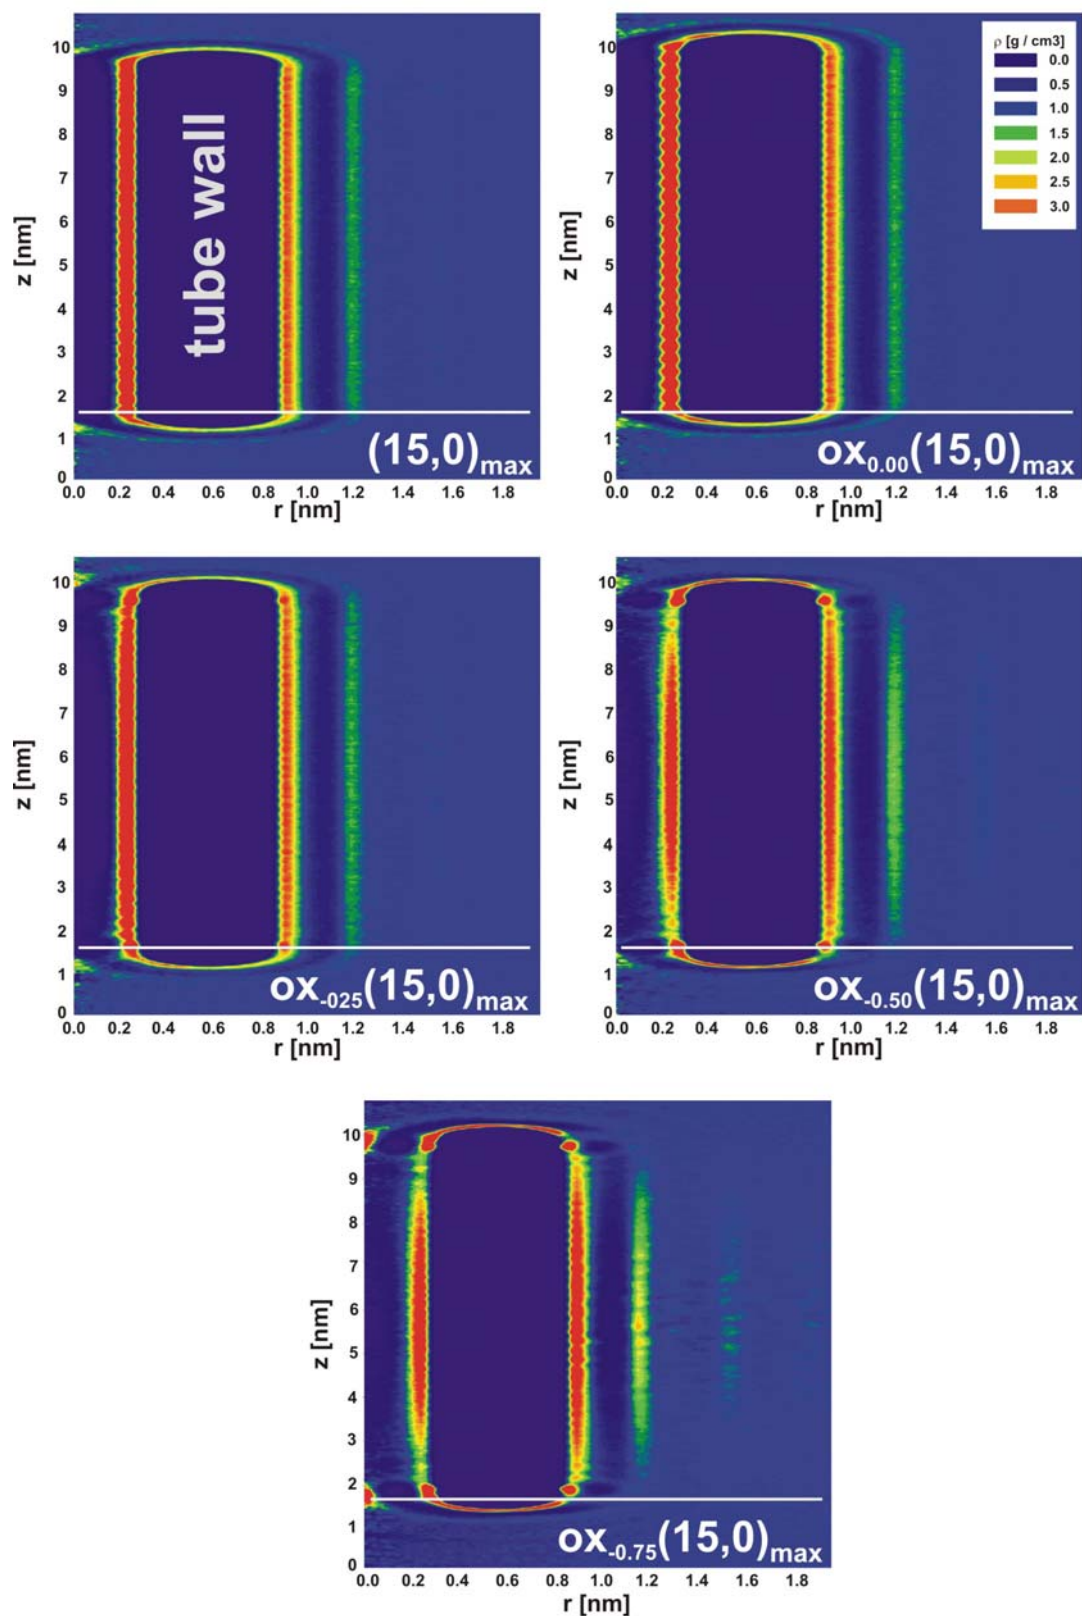

**Fig. ESI 3.** Density profiles ( $\text{g}/\text{cm}^3$ ) determined for selected tubes and assuming that the centre of the molecules is located on oxygen atom,  $r$  is the distance from the tube axis and  $z$  is the direction of the tube axis. The effect of charge distributions. White horizontal line shows the slice discussed in Fig. 5.

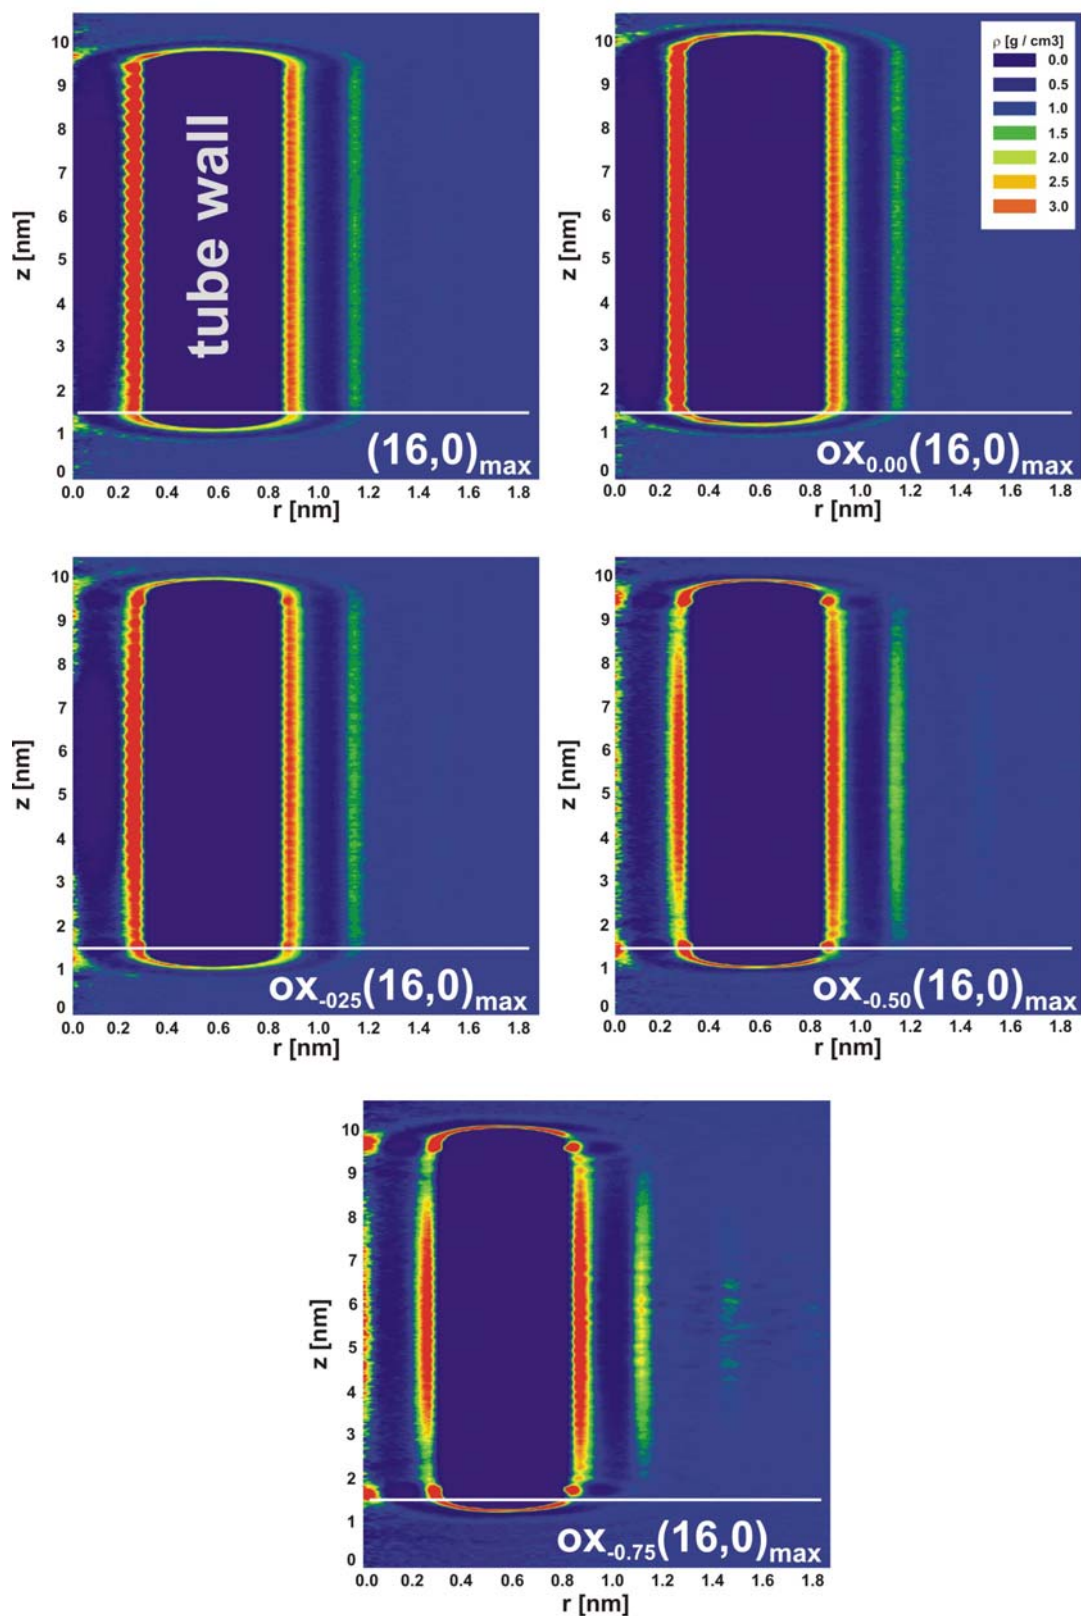

**Fig. ESI 4.** Density profiles (g/cm<sup>3</sup>) determined for selected tubes and assuming that the centre of the molecules is located on oxygen atom,  $r$  is the distance from the tube axis and  $z$  is the direction of the tube axis. The effect of charge distributions. White horizontal line shows the slice discussed in Fig. 5.

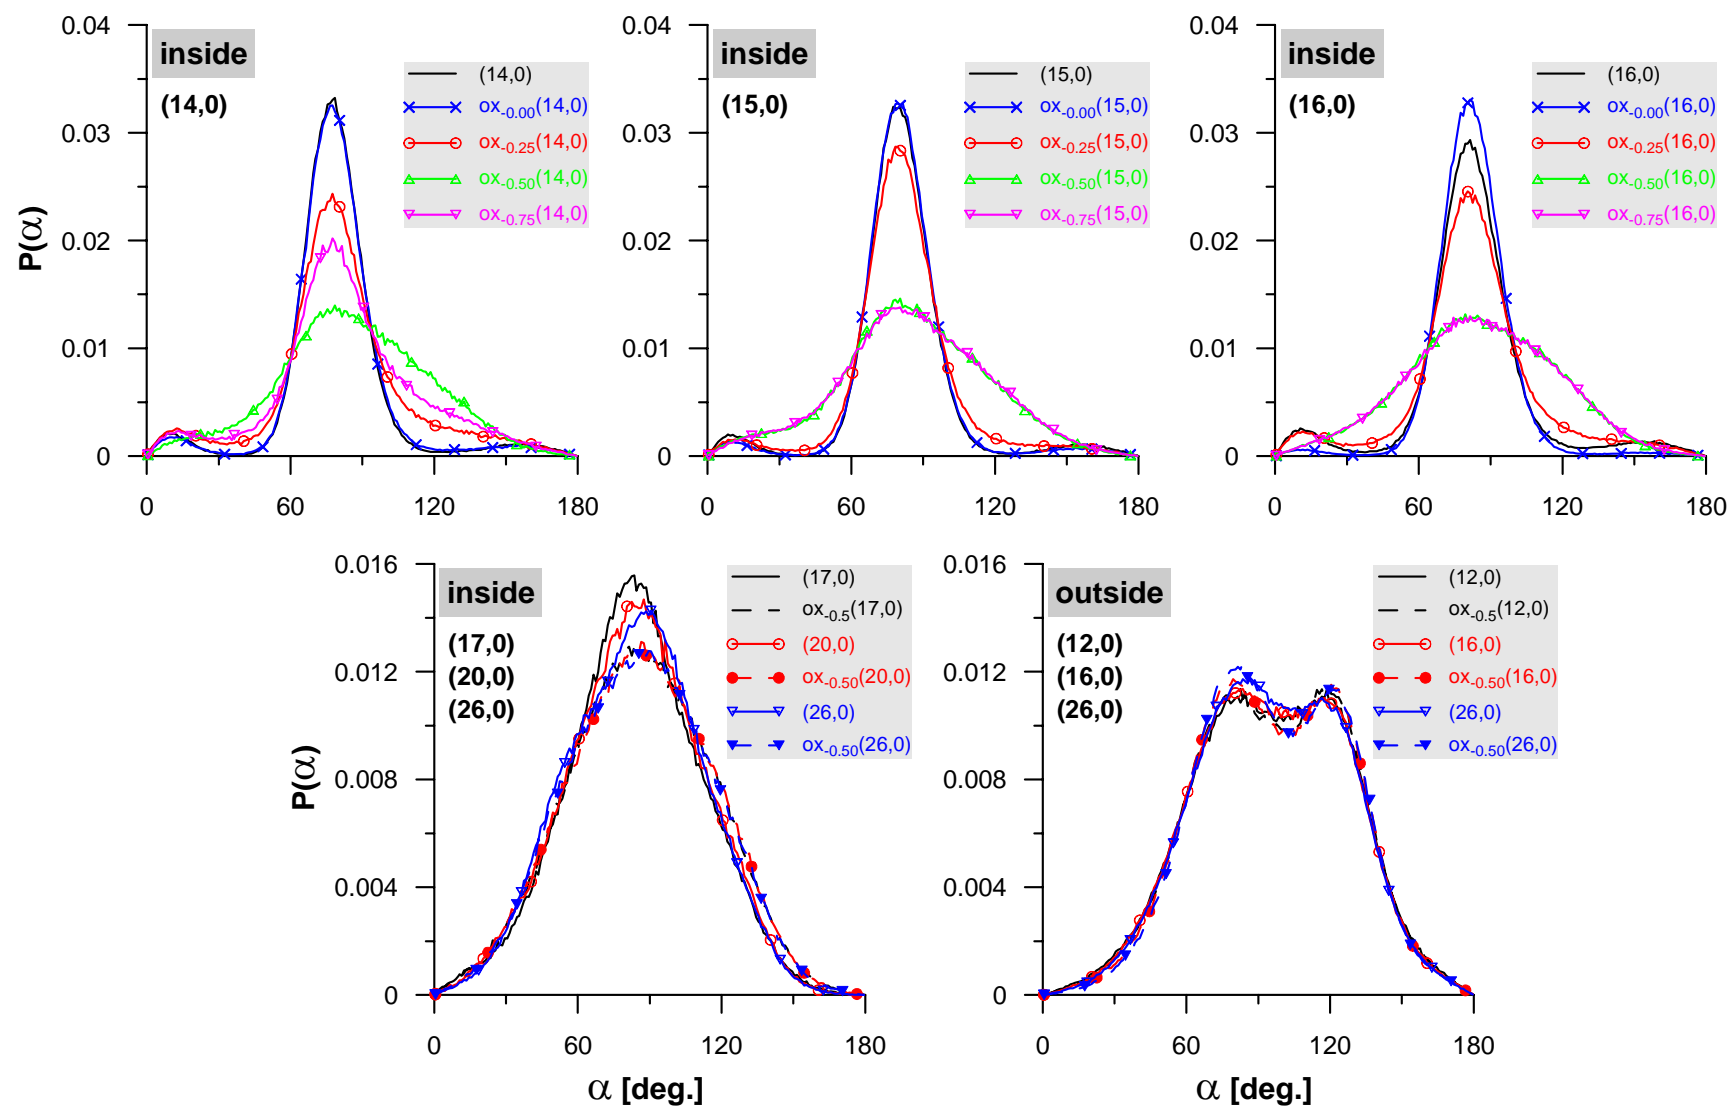

**Fig. ESI 5.** Histograms of the orientation of water dipole moment vector with respect to the surface of selected tubes.

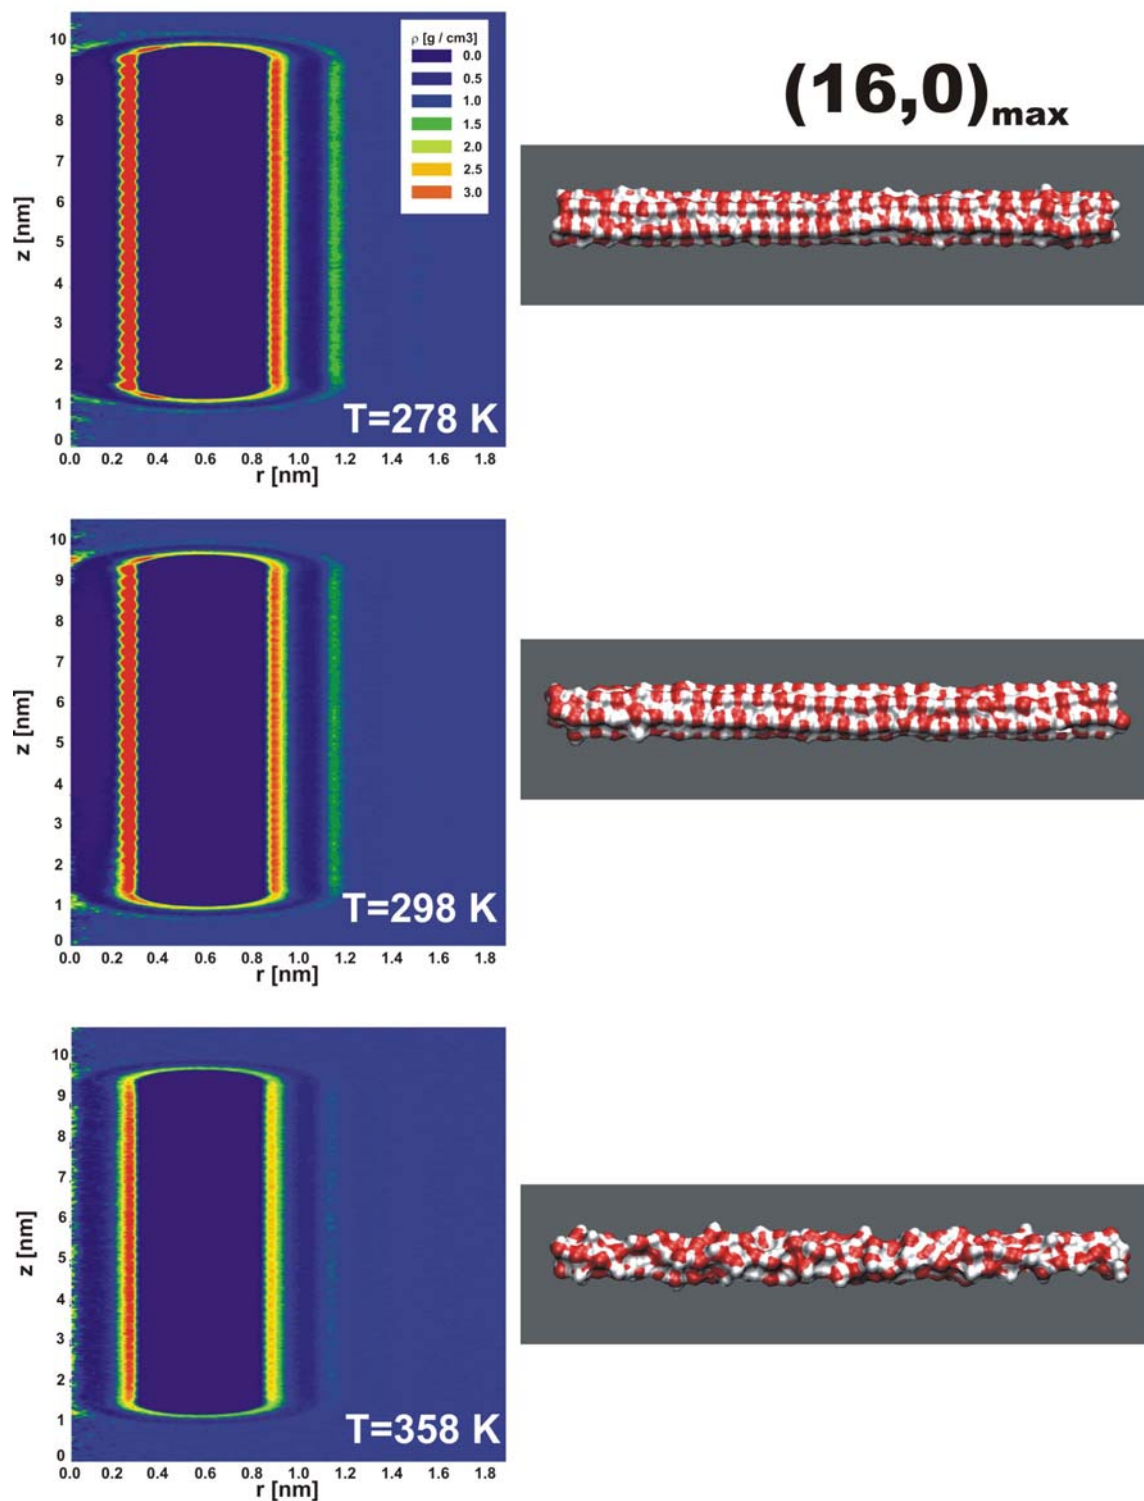

**Fig. ESI 6.** Density profiles ( $\text{g}/\text{cm}^3$ ) determined for selected tubes and assuming that the centre of the molecules is located on oxygen atom,  $r$  is the distance from the tube axis and  $z$  is the direction of the tube axis. The effect of temperature.

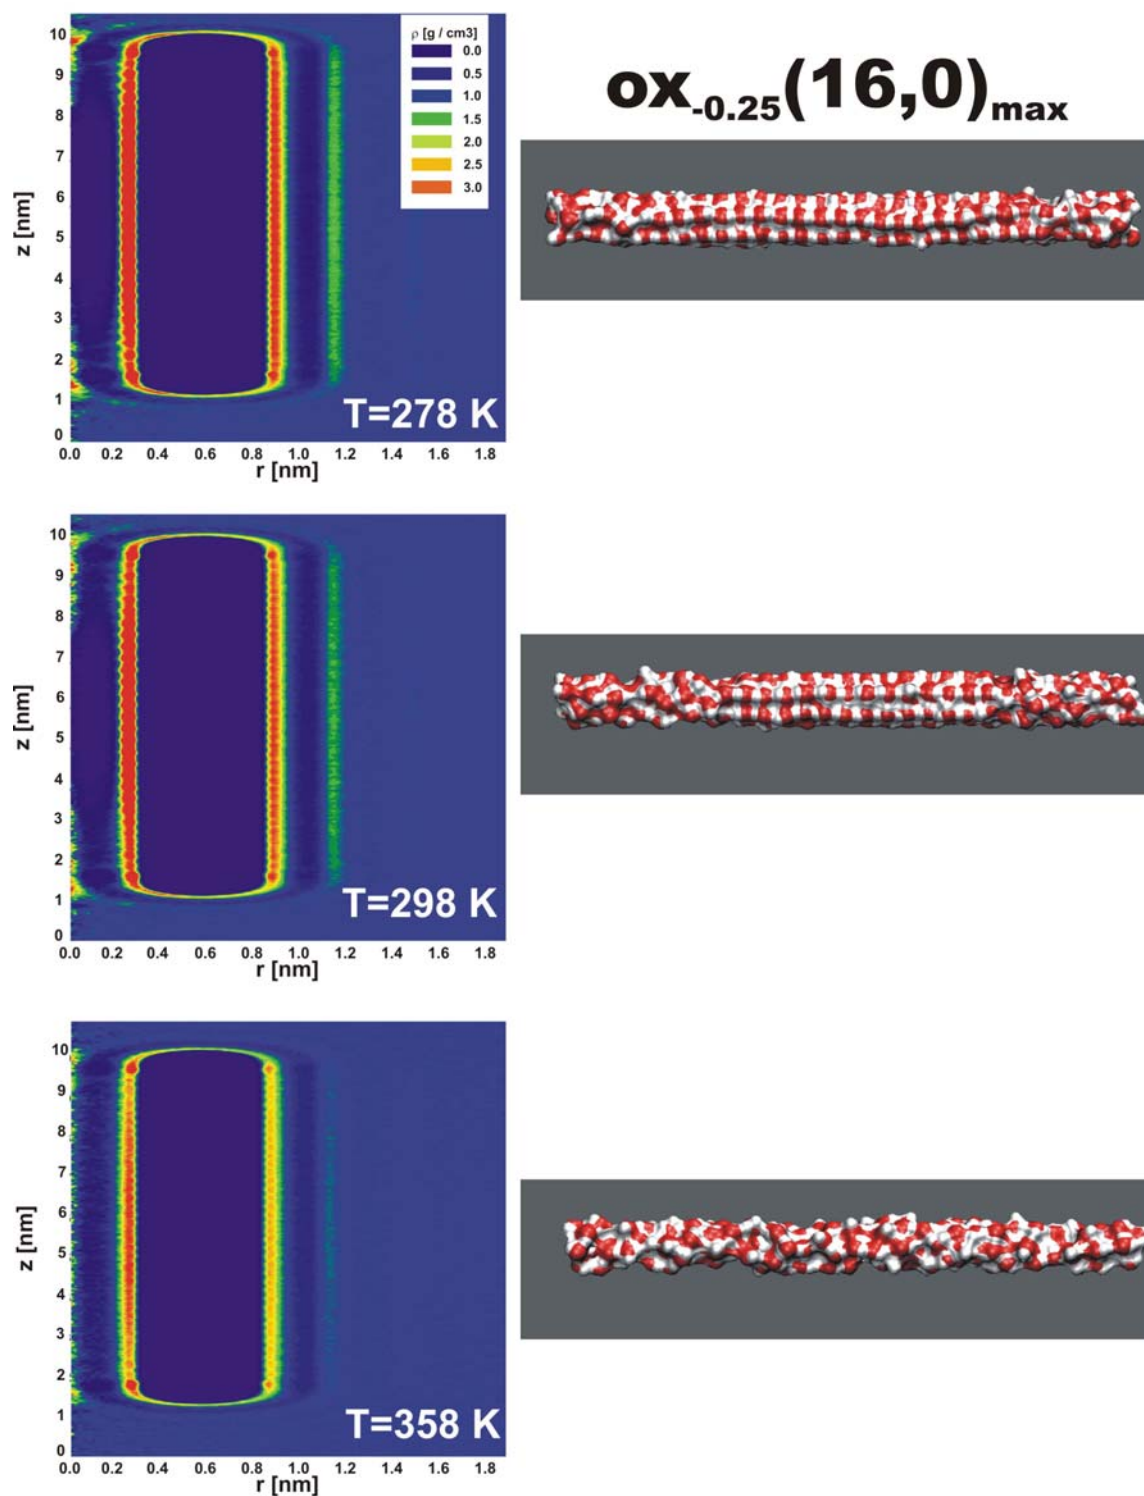

**Fig. ESI 7.** Density profiles ( $\text{g}/\text{cm}^3$ ) determined for selected tubes and assuming that the centre of the molecules is located on oxygen atom,  $r$  is the distance from the tube axis and  $z$  is the direction of the tube axis. The effect of temperature.



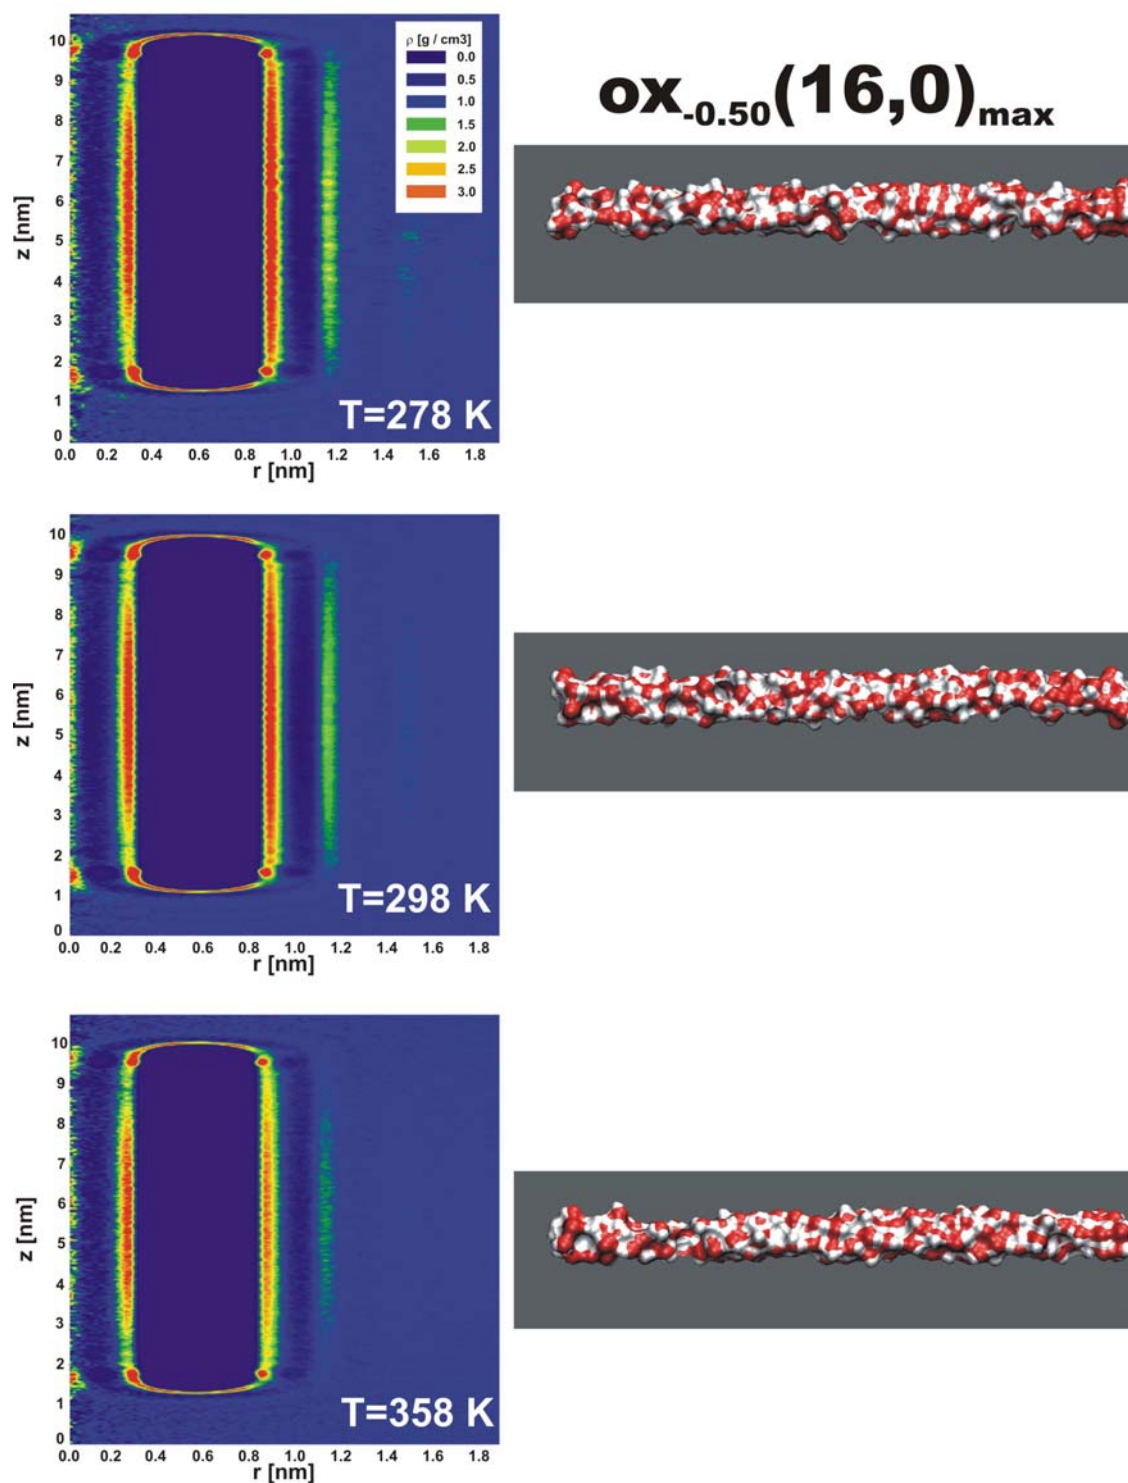

**Fig. ESI 8.** Density profiles (g/cm<sup>3</sup>) determined for selected tubes and assuming that the centre of the molecules is located on oxygen atom,  $r$  is the distance from the tube axis and  $z$  is the direction of the tube axis. The effect of temperature.

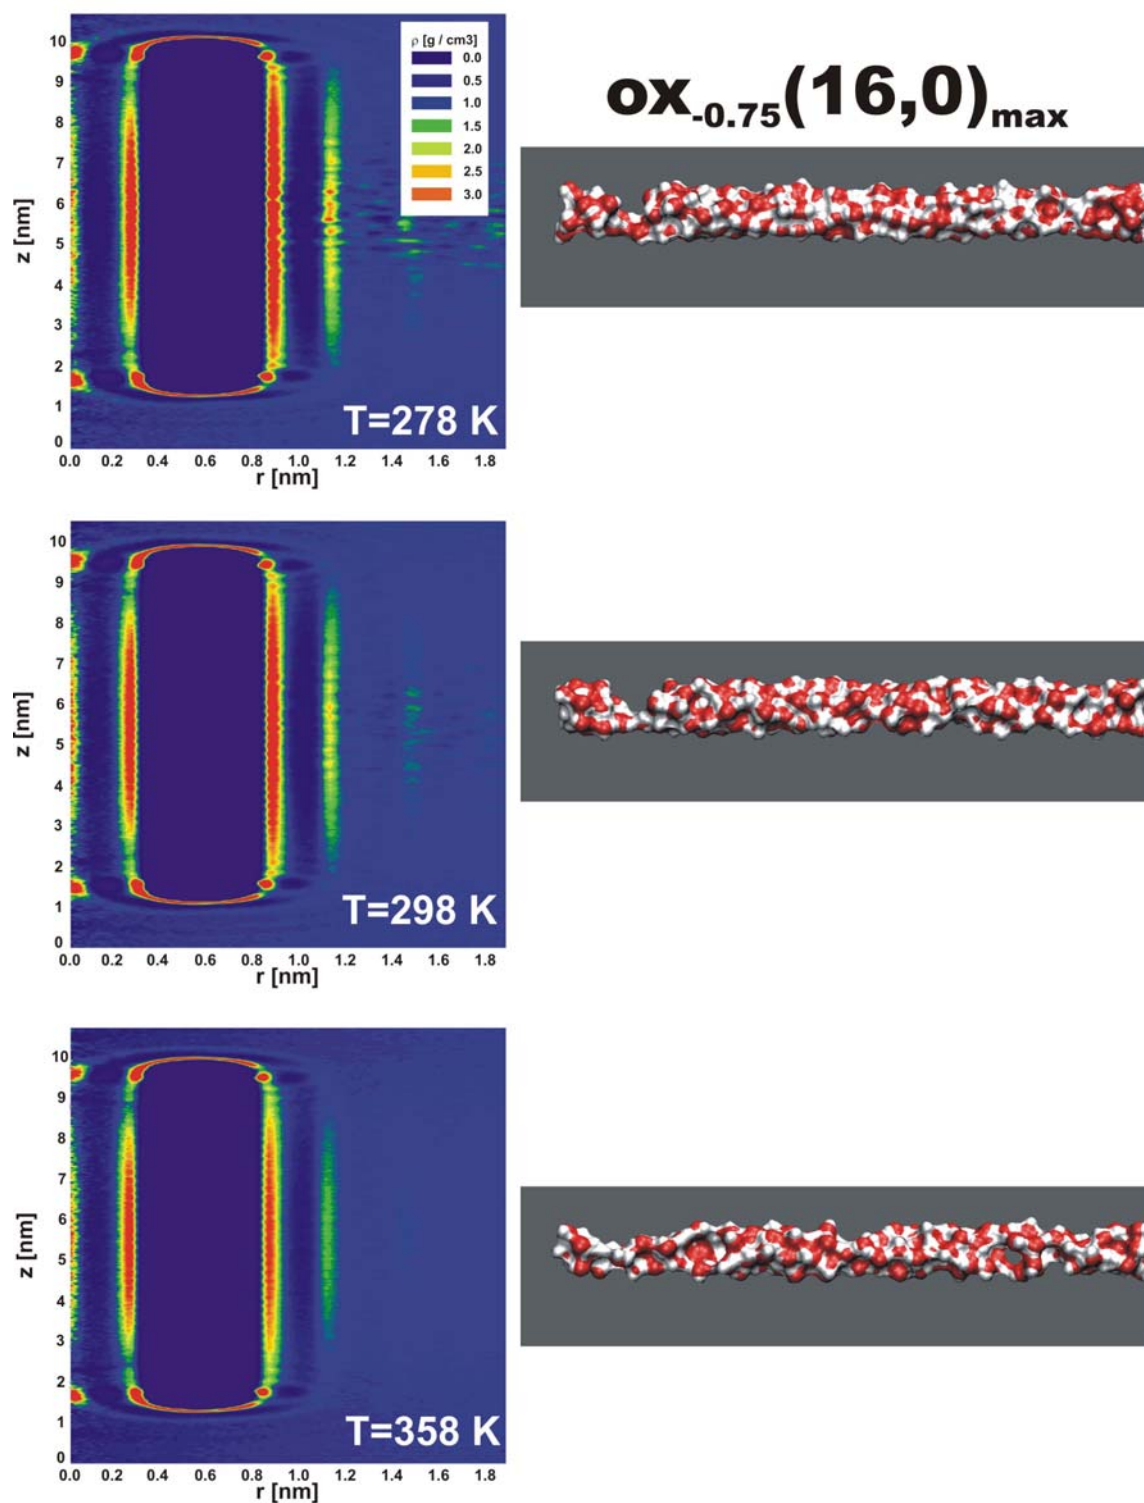

**Fig. ESI 9.** Density profiles (g/cm<sup>3</sup>) determined for selected tubes and assuming that the centre of the molecules is located on oxygen atom,  $r$  is the distance from the tube axis and  $z$  is the direction of the tube axis. The effect of temperature.
